# Supplementary material for: Impulse control behaviours in patients with Parkinson's disease after subthalamic deep brain stimulation: de novo cases and 3-year follow-up
Source: HighWire-hosted journal article supplement (doi:10.1136/jnnp-2013-307214), 2014-07-10

## Supplementary Figures

Comparison of the "ICB" and "No-ICB"s groups at baseline and through the 3-year follow-up period. The average dose of levodopa and dopamine agonists is reported (with the number of patients taking each drug class shown in brackets). Abbreviations: LD, levodopa; DA, dopamine agonists.

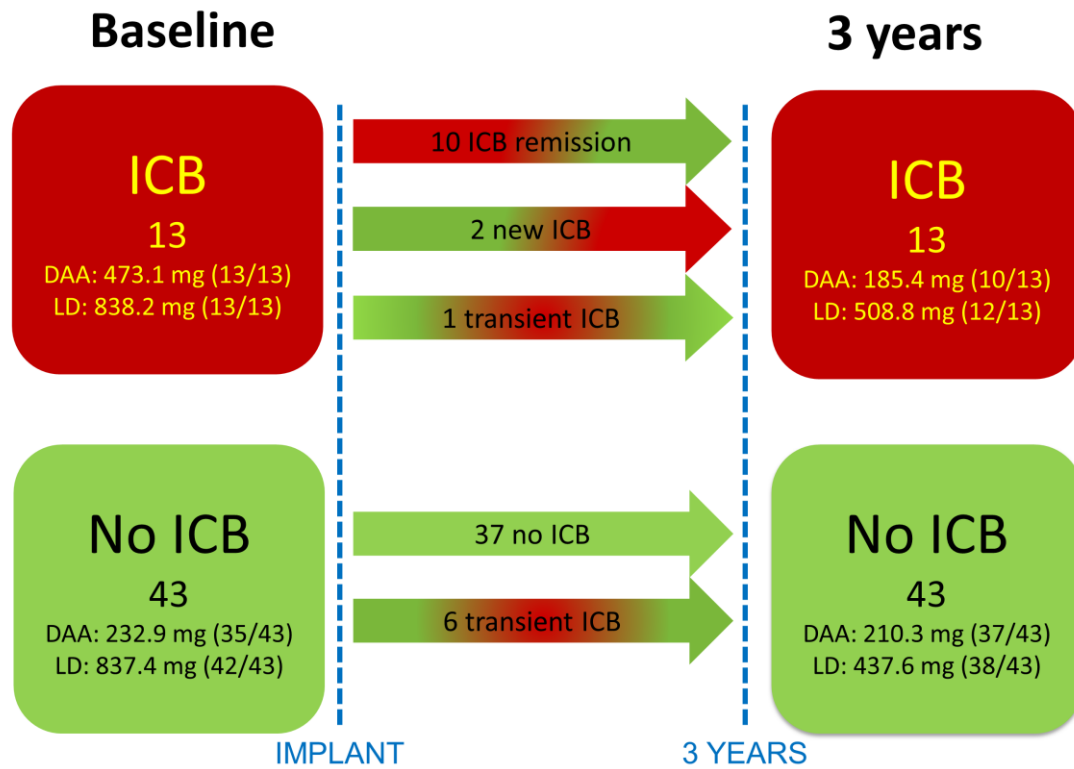

Reconstruction of electrode positioning and volume of tissue activated in six patients who developed de novo ICBs after implant. In an anterior view of the brain stem the STN (blue), the substantia nigra (fuchsia) and the red nucleus (pink) are individually reconstructed in 3D. The electrode location and the volume of tissue activated are superimposed to the anatomical landmarks (images generated by the Optivise DBS Care Management Software). Lead1 refers to the right electrode, Lead2 to the left one.

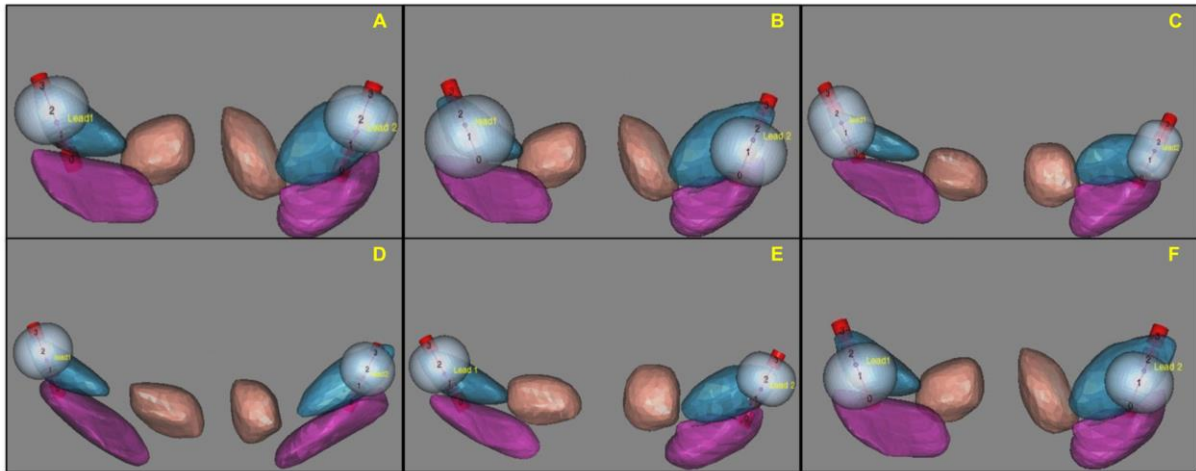

Supplement: jnnp-2013-307214supp.pdf [file jnnp-2013-307214supp.pdf]
